# Supplementary material
Source: PubMed Central journal article supplement (PMC3157278)

**A****B****C****D****E**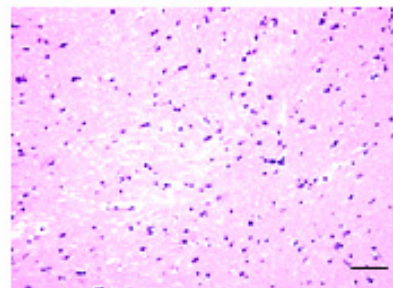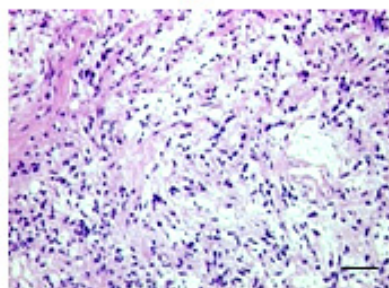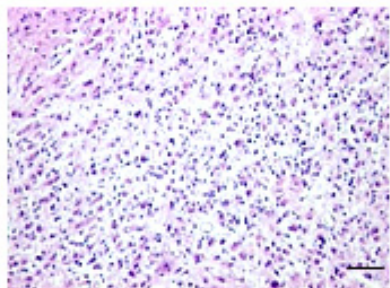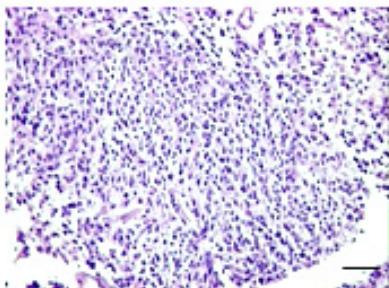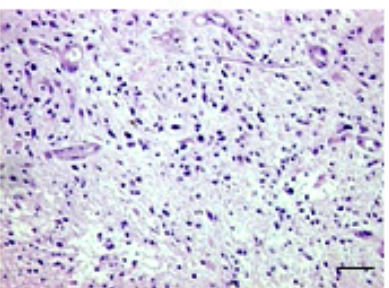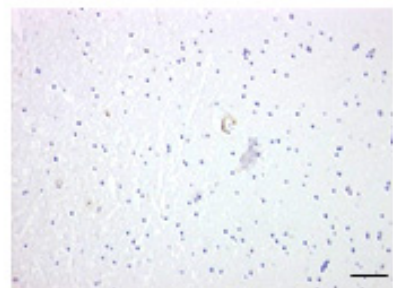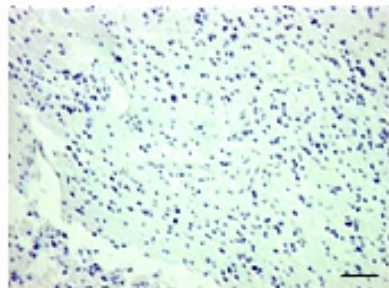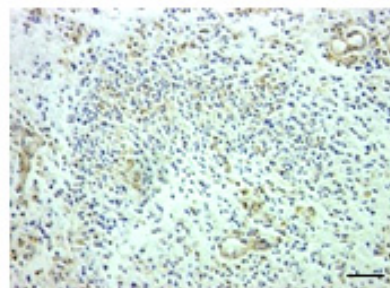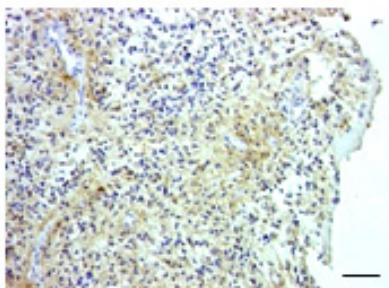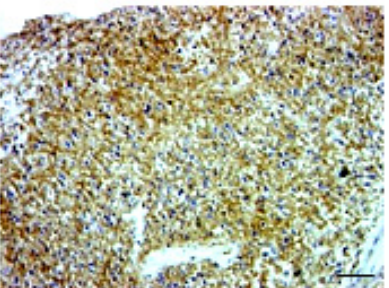

0

0

1-4

5-8

 $\geq 9$ 

Scores

Supplement: mmc1.pdf [file mmc1.pdf]
